# Supplementary material for: Cognate DNA Recognition by Engrailed Homeodomain Involves A Conformational Change Controlled via An Electrostatic-Spring-Loaded Latch
Source: MDPI journal article supplement (doi:10.3390/ijms23052412), 2022-02-22
Supplement: s1 [file s1]

Supplementary Information

## Cognate DNA Recognition by Engrailed Homeodomain Involves a Conformational Change Controlled via an Electrostatic-Spring-Loaded Latch

Nicola D'Amelio, Benjamin Tanielian, Mourad Sadqi, Pilar López-Navajas, and Victor Muñoz

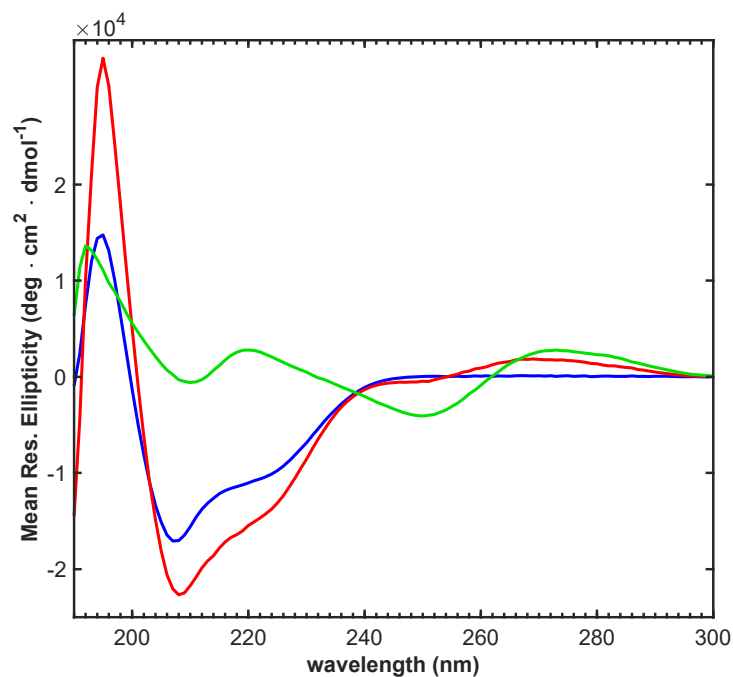

**Figure S1: Circular dichroism analysis of enHD and cognate DNA.** Near-far-UV circular dichroism spectra of samples with enHD and DNA in 20 mM MES buffer at pH 6, and 25 mM NaCl. (blue) enHD alone; (green) 21 bp cognate DNA alone; (red) mix of enHD and DNA at 1:1 ratio. All samples were prepared at 15  $\mu$ M of protein and/or DNA.
